# Supplementary material
Source: Frontiers journal article supplement (https://www.frontiersin.org/articles/521626)
Supplement: Table_5.XLSX [file Table_5.XLSX]

## Sheet: Foglio1
species	Specimen Number	Source	Continent	Age (Ma)	M1	M3	M4	M6	M7	M8	M9	M15	M18	M23	M30	M31
Equus grevyi	USNM152231	Own	Africa	0.0	144.4	140.7	127.9	530.2	95.8	77.6	171.6	56.2	222.2	409.4	179.1	194.6
Equus grevyi	USNM163228	Own	Africa	0.0	141.7	134.9	132.4	552.7	99.5	81.3	179.4	60.7	218.5	440.1	193.1	199.5
Equus grevyi	USNM182063	Own	Africa	0.0	151.3	134.9	134.9	561.9	100.9	81.1	181.3	62.5	210.1	447.9	187.4	205.2
Equus grevyi	USNM182027	Own	Africa	0.0	149.7	136.1	130.1	537.8	93.5	74.9	166.2	54.7	221.8	431.4	180.3	200.2
Equus grevyi	USNM163334	Own	Africa	0.0	146.3	142.4	131.9	544.9	98.1	80.9	177.2	60.2	200.3	429.9	193.3	184.2
Equus grevyi	USNM163338	Own	Africa	0.0	155.6	140.4	134.7	568.3	100.1	85.5	177.6	61.1	215.1	456.2	192.4	216.7
Equus grevyi	USNM163331	Own	Africa	0.0	155.2	142.1	133.1	563.4	103.5	82.6	184.7	59.3	216.9	453.7	197.4	219.7
Equus grevyi	USNM199079	Own	Africa	0.0	138.4	137.9	136.4	529.6	98.9	80.1	175.7	62.5	209.1	428.2	190.1	195.9
Equus grevyi	USNM182028	Own	Africa	0.0	141.5	131.6	140.2	542.2	100.6	80.6	177.8	60.5	210.1	426.6	186.3	195.9
Equus grevyi	USNM241009	Own	Africa	0.0	160.1	131.4	140.2	554.6	100.1	74.6	168.9	61.1	210.9	440.3	186.7	204.3
Equus koobiforensis	KNM-ER1484	Own	Africa	2.33 Ma	148.5	152	126	580.8	112.8	93.4	201.5	70	224.8	460.8	211.5	183.1
Equus eisenmannae	IVPP-13552	Wang and Deng, 2011	China	2.55	175	144	107	579	107	88	195	83	231	475	218.3	186.3
Equus eisenmannae	IVPPLon003	Wang and Deng, 2011	China	2.55	156	125	108	580	117	89	206	70	231	458	225.4	196.1
Equus eisenmannae	IVPPLon	Wang and Deng, 2011	China	2.55	180	125	102	585	111	90	200	75	215	479	225.4	196.1
Equus eisenmannae	IVPPLon004	Wang and Deng, 2011	China	2.55	155	144	102	585	114	92	206	65	186	495	218.3	186.3
Equus huanghoensis	NWUV 1403.1	Li et al., 2015	China	Early Pleistocene	170	130	100	558	105.5	88.9	193	77.8	220	455	230	172
Equus sanmeniensis	MNHN-NHI002	Vera Eisenmann website	China	Early Pleistocene	155	152	126	580	103	90.5	192	70	220	480	225	193
Equus sp. Senèze	NHML SZ30	Own	Europe	2.2 - 2.0	140.3	114.4	128.2	536.7	97.3	79.4	177.1	66.3	218.9	445.3	215.4	157.8
Equus sp. Senèze	UCBL-FSL210993	Vera Eisenmann website	Europe	2.2 - 2.0	145	135	110	540	103	81	184	71	220	450	228	165
Equus sp. Senèze	UCBL-FSL5233	Vera Eisenmann website	Europe	2.2 - 2.0	141	127	122	540	96	80	178	69	220	440	228	165
Equus sp. Senèze	NHB 336	Vera Eisenmann website	Europe	2.2 - 2.0	140	135	110	535	104	83	187	71	236	438	228	165
Equus stenonis vireti	NHML 20.163356	Own	Europe	2.4	155.3	137.8	129.1	555.3	102.5	84.1	186.7	67.1	230.1	453.1	222.7	178.4
Equus stenonis vireti	NHML 20.163360	Own	Europe	2.4	156.7	139.1	121.8	553.9	101.6	85.7	185.1	68.4	230.1	453.8	233.3	159.4
Equus stenonis vireti	NHML 20.163372	Own	Europe	2.4	146.7	125.1	141.1	553.2	100.3	82.9	182.7	60.3	216.9	456.1	231.7	186.4
Equus stenonis vireti	QSV 222	Vera Eisenmann website	Europe	2.4	145	125.1	141.1	550	100	84	186	69	226	445	220	170
Equus stenonis_Warp	IGF560_W	Own	Europe	1.9 - 1.8	156.7	131.7	145.9	550.3	101.9	81.9	180.8	69.9	200.2	439.8	233.7	165.9
Equus stenonis_Warp_Spec	IGF560_W-s	Own	Europe	1.9 - 1.8	156.9	132.8	147.6	550.9	101.9	81.6	180.8	68.7	201.3	436.5	233.7	169.4
Equus simplicidens	USNM 12573	Own	North America	4.1 Ma	141.5	151.6	98.8	535.1	105.2	84.6	191.5	61.9	224.7	452	202.1	193.2
Equus simplicidens	USNM13791	Own	North America	4.1 Ma	137.5	154.8	105.8	535	101.9	84.4	188.5	66.4	198.4	440	195.3	194.5
Equus simplicidens	AMNH32551	Vera Eisenmann website	North America	4.1 Ma	135	154.8	105.8	530	102	84	185	61	206	420	189	187
Equus simplicidens	AMNH32553	Vera Eisenmann website	North America	4.1 Ma	145	147	111	540	95	81	176	71	224	440	195	203
Equus simplicidens	AMNH32555	Vera Eisenmann website	North America	4.1 Ma	147	148	109	530	103	92	192	57	224	440	182	205
Equus simplicidens	AMNH32556	Vera Eisenmann website	North America	4.1 Ma	145	148	109	550	106	84	190	70	210	440	195	197
Equus simplicidens	YA14560	Vera Eisenmann website	North America	4.1 Ma	136	145	92	515	101	89	190	63	210	415	191	190
Equus simplicidens	USNM11988	Vera Eisenmann website	North America	4.1 Ma	145	160	100	510	103	86	188	63	227	445	191	210
Equus simplicidens	USNM11989	Vera Eisenmann website	North America	4.1 Ma	140	156	100	510	108	85	190	65	244	440	189	205
Equus simplicidens	USNM12155	Vera Eisenmann website	North America	4.1 Ma	154	145	103	537	104	90	192	67	227	435	189	205
Equus simplicidens	USNM12500	Vera Eisenmann website	North America	4.1 Ma	135	145	103	523	103	85	189	65	200	430	190	206
Equus simplicidens	USNM12501	Vera Eisenmann website	North America	4.1 Ma	148	142	117	540	96	82	178	65	236	435	190	190
Equus simplicidens	USNM12525	Vera Eisenmann website	North America	4.1 Ma	161	145	112	545	102	84	188	66	230	450	180	200
Equus simplicidens	USNM12528	Vera Eisenmann website	North America	4.1 Ma	148	145	112	535	102	84	187	67	215	435	196	190
Equus simplicidens	USNM12529	Vera Eisenmann website	North America	4.1 Ma	148	150	112.5	530	107	88	195	67	222	420	193	191
Equus simplicidens	USNM12535	Vera Eisenmann website	North America	4.1 Ma	128	140	95	505	101	87	182	67	229	420	193	195
Equus simplicidens	USNM12538	Vera Eisenmann website	North America	4.1 Ma	145	142	115	530	90	78	167	67	216	425	198	193
Equus simplicidens	USNM12542	Vera Eisenmann website	North America	4.1 Ma	145	110	132	525	107	90	199	64	228	430	199	193
Equus simplicidens	USNM12543	Vera Eisenmann website	North America	4.1 Ma	145	155	107	540	105	87	192	64	242	435	201	211
Equus simplicidens	USNM12576	Vera Eisenmann website	North America	4.1 Ma	138	141	112	520	100	85	185	63	205	425	185	199
Equus simplicidens	USNM13835	Vera Eisenmann website	North America	4.1 Ma	147	158	100	540	97	82	180	64	222	445	199	193
Equus simplicidens	USNM16999	Vera Eisenmann website	North America	4.1 Ma	145	158	100	535	104	86	192	71	214	455	191	200
Institutional acronyms
USNM: United Stated National Museum, Smithsonian Institution; Washington DC, USA.
AMNH: American Museum of Natural History; New York, USA.
YA: Peabody Museum; Yale, USA.
IVPP: Institute of Vertebrate Paleontology and Paleoanthropology; Beijing, China.
NWUV: Institute of Cenozoic Geology and Enviromental, Northwest University, China.
IGF: Museo di Storia Naturale di Firenze, Sezione di Geologia e Paleontologia; Firenze, Italy.
NHML: Natural History Museum of Lyon; Lyon, France.
QSV: Natural History Museum of Lyon; Lyon, France (Old Acronym).
UCBL-FSL: Universitè Claude Bernard-1; Lyon, France.
NHB: Natural History Museum; Basel, Switzerland.
KNM-ER: Kenya National Museum, East Rudolf; Nairobi, Kenya.
